# Supplementary material
Source: Springer Nature journal article supplement (https://www.springermedizin.de/resource/supplementary/12887_2011_591_MOESM5_ESM.pdf/9475848)

Kaplan-Meier Survival estimate among HIV-1infected children on ART

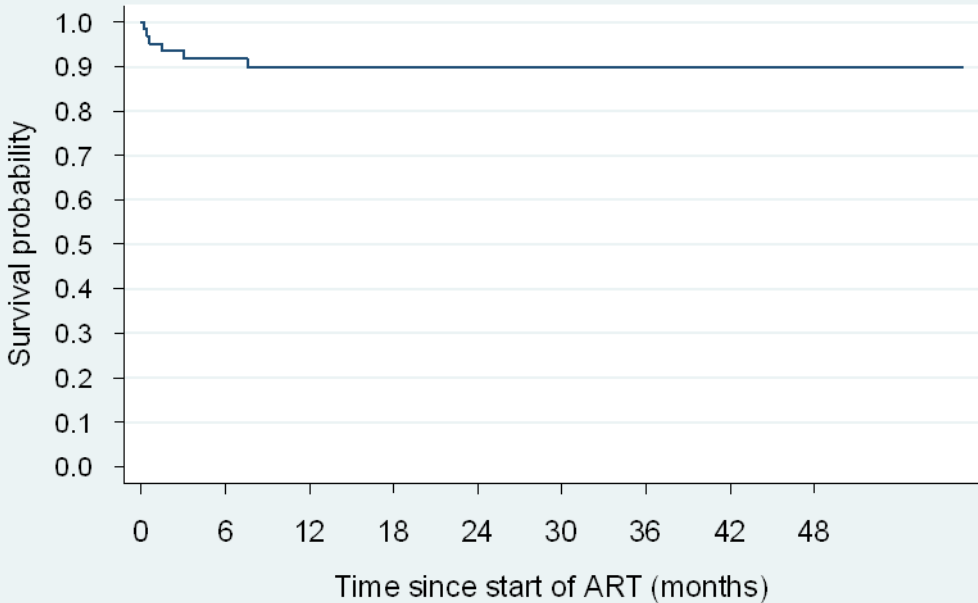

Number at risk 65 50 38 34 28 21 16 9 5

Supplement: MOESM5 [file 9475848]
